# Supplementary material for: Antibacterial and Phytochemical Screening of Artemisia Species
Source: MDPI journal article supplement (doi:10.3390/antiox12030596), 2023-02-27
Supplement: s1 [file s1]

## Antibacterial and Phytochemical screening of *Artemisia* species

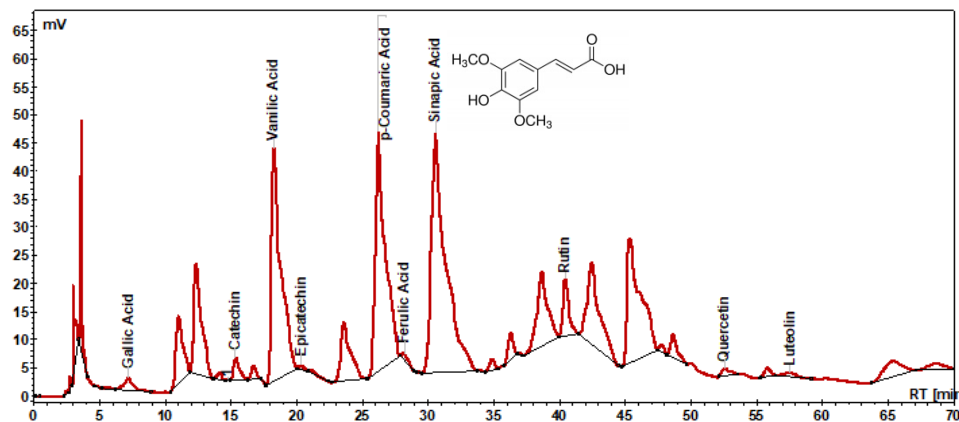

a. AnL

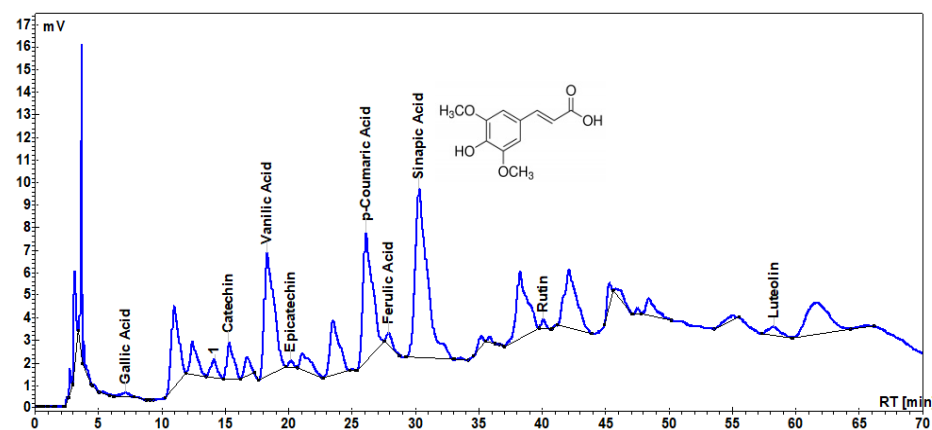

b. AnS

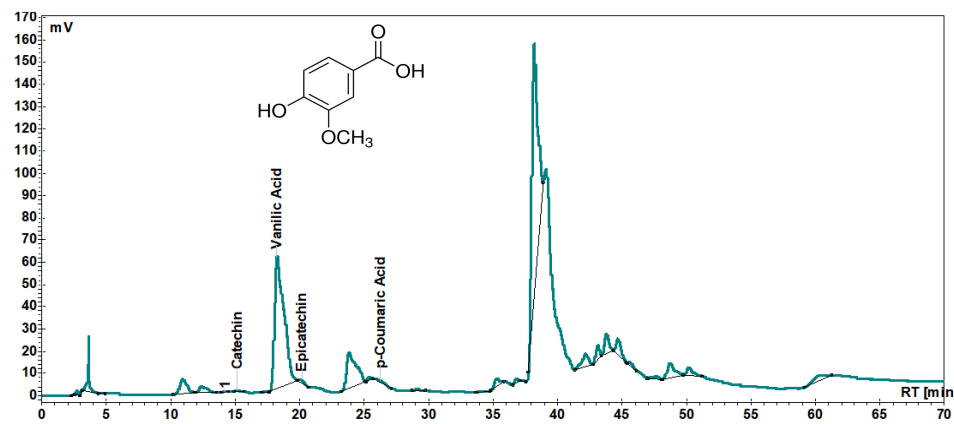

c. AbL2

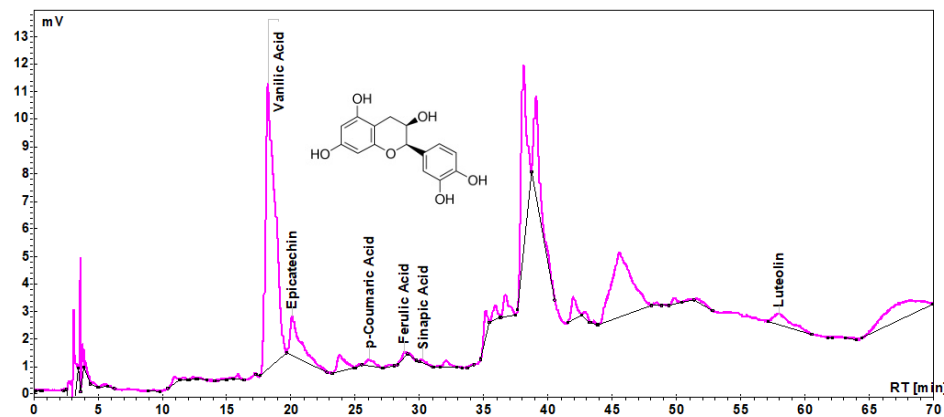

d. AbS2

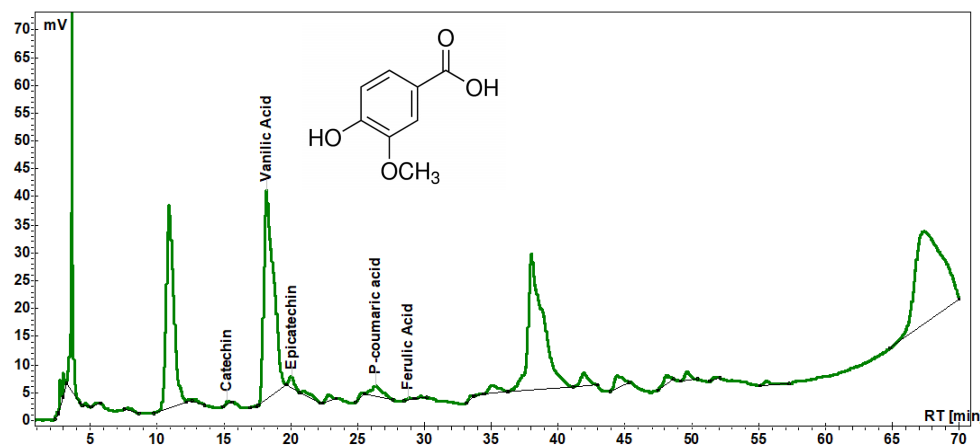

e. AbL1

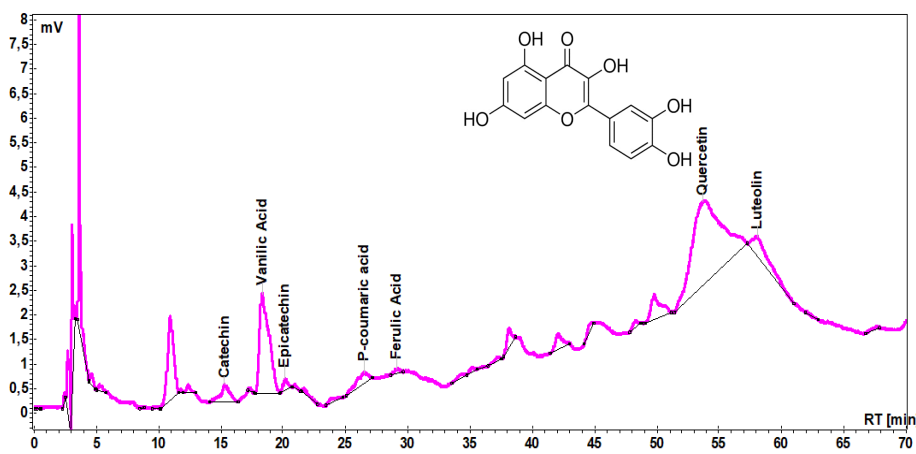

f. AbS1

**Figure S1.** HPLC chromatograms of the polyphenols content in wormwood ethanolic aerial parts. (AnL - *Artemisia annua* L. leaf, AnS - *Artemisia annua* L. stem, AbL2 - *Artemisia absinthium* L. leaf, AbS2 - *Artemisia absinthium* L. stem, AbL1 - *Artemisia absinthium* L. leaf, AbS1 - *Artemisia absinthium* L. stem)
